# Supplementary material
Source: ML conference proceedings conference paper supplement (https://proceedings.neurips.cc/paper_files/paper/2020/hash/1d8d70dddf147d2d92a634817f01b239-Abstract.html)
Supplement: Supplementary file [file 1d8d70dddf147d2d92a634817f01b239-Supplemental.zip]

# Pareto Plot COMPAS (race)

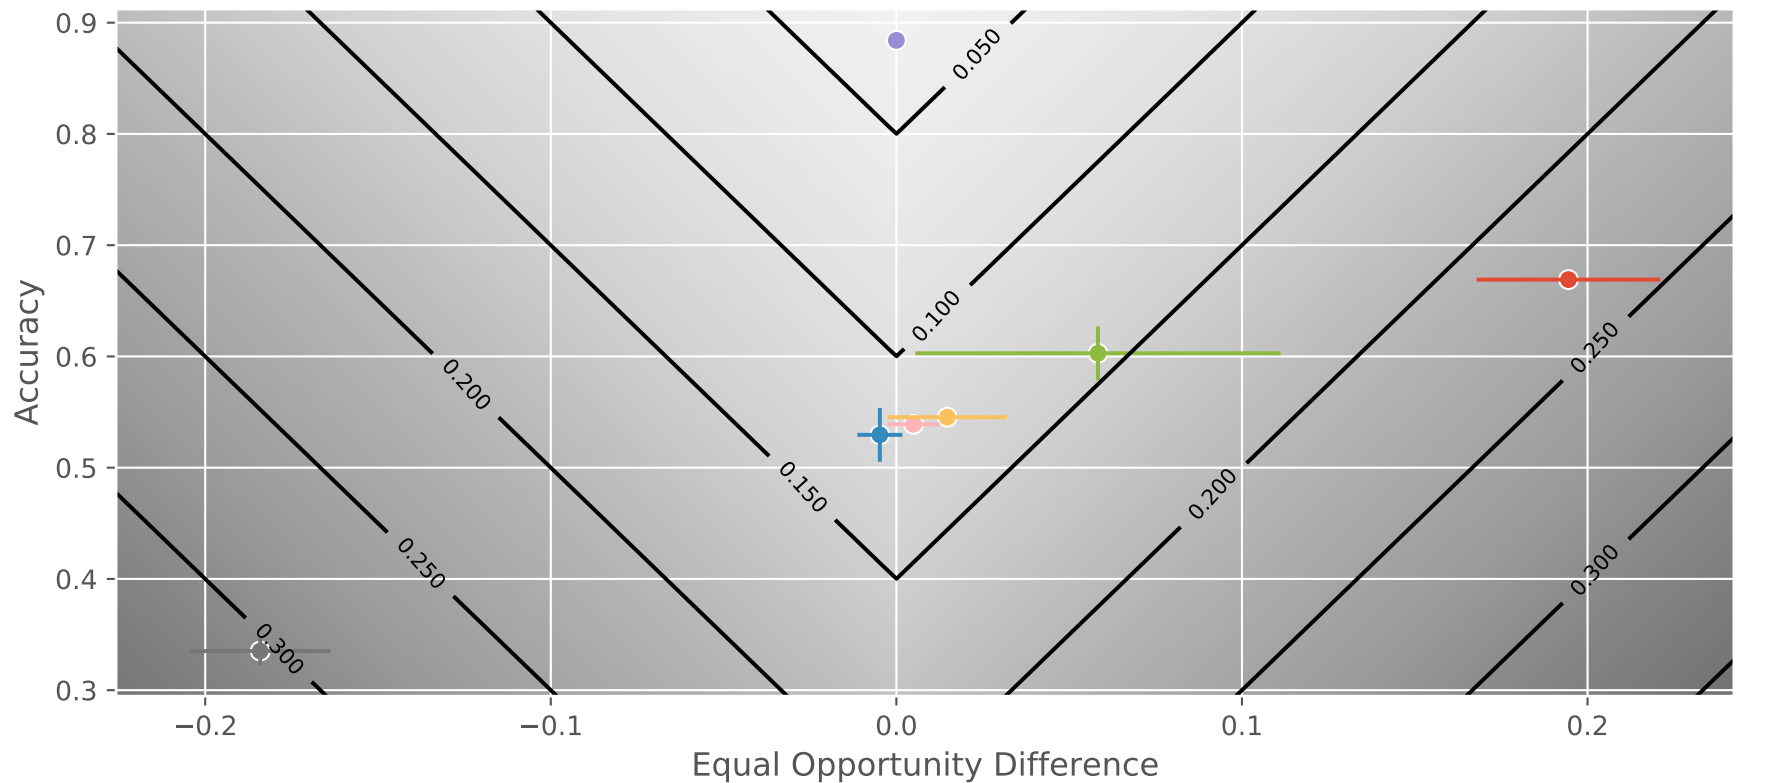

● Default
 ● ROC
 ● EqOdds
 ● CalibEqOdds
 ● Random
 ● Adversarial
 ● LayerwiseOpt
