# Supplementary material
Source: ML conference proceedings conference paper supplement (https://proceedings.neurips.cc/paper_files/paper/2020/hash/1d8d70dddf147d2d92a634817f01b239-Abstract.html)

# Pareto Plot ACI (sex)

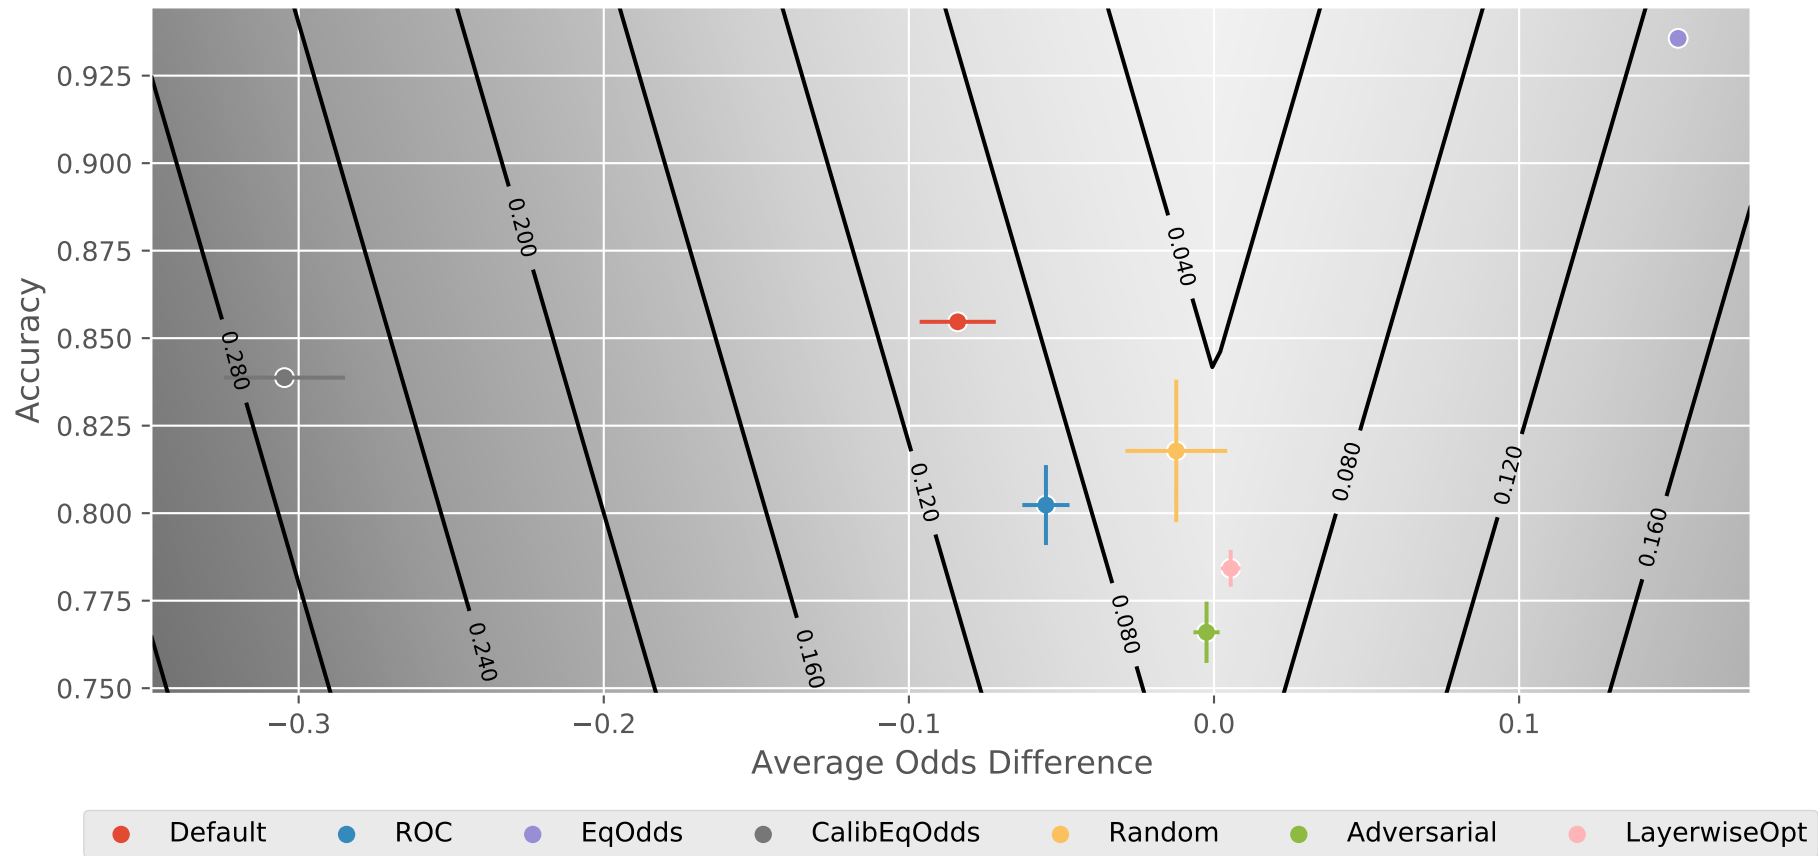

Supplement: Supplementary file [file 1d8d70dddf147d2d92a634817f01b239-Supplemental.zip]
