# Supplementary material
Source: ML conference proceedings conference paper supplement (https://proceedings.neurips.cc/paper_files/paper/2020/hash/1d8d70dddf147d2d92a634817f01b239-Abstract.html)
Supplement: Supplementary file [file 1d8d70dddf147d2d92a634817f01b239-Supplemental.zip]

# Pareto Plot BM (age)

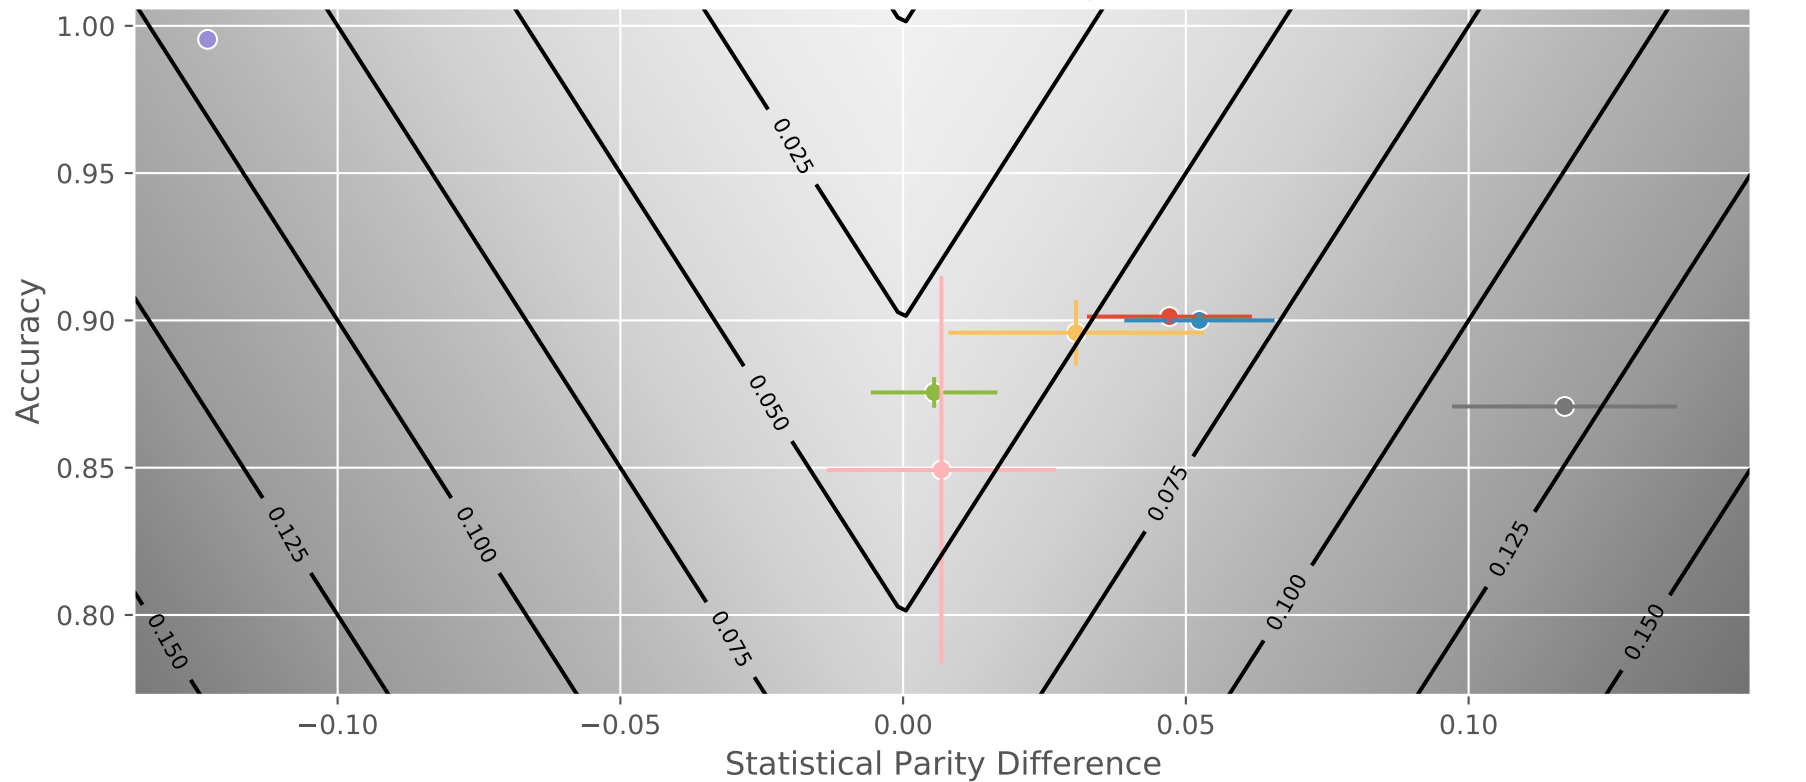

● Default   
 ● ROC   
 ● EqOdds   
 ● CalibEqOdds   
 ● Random   
 ● Adversarial   
 ● LayerwiseOpt
